# Supplementary material
Source: PubMed Central journal article supplement (PMC555478)

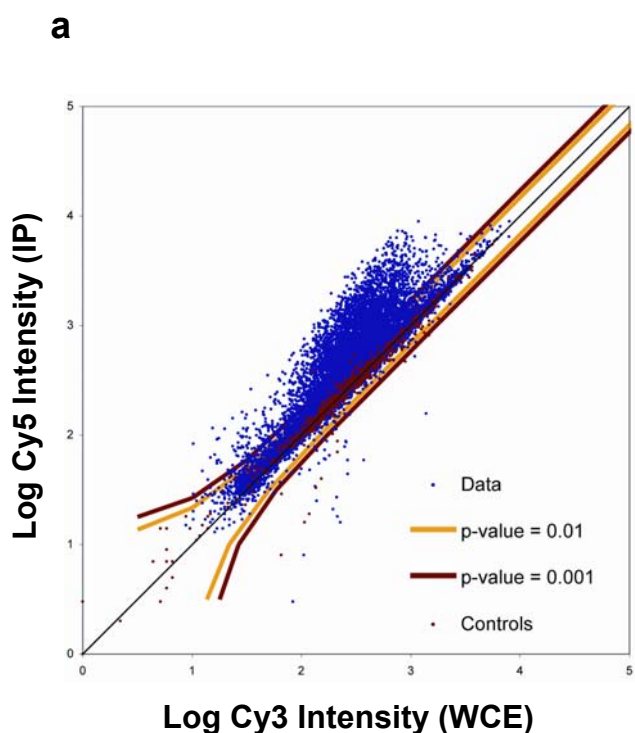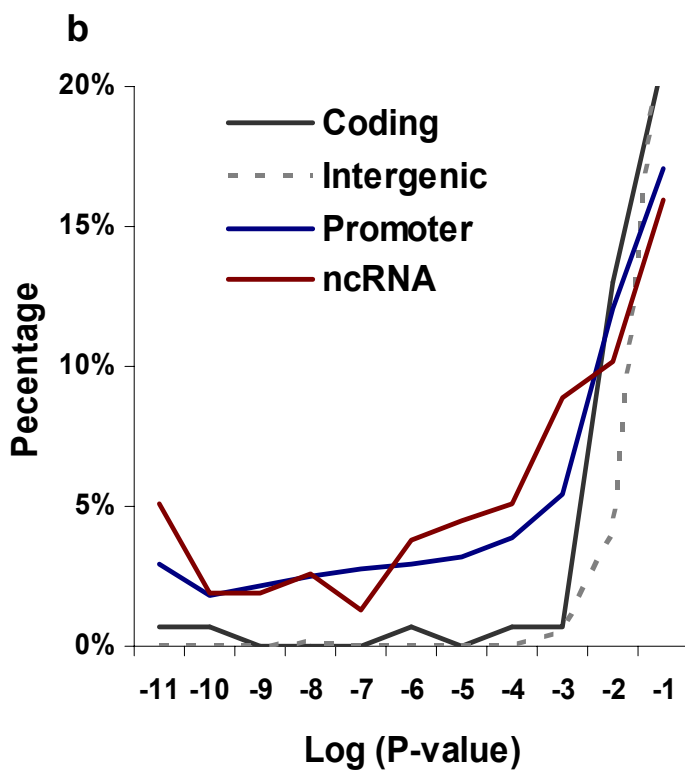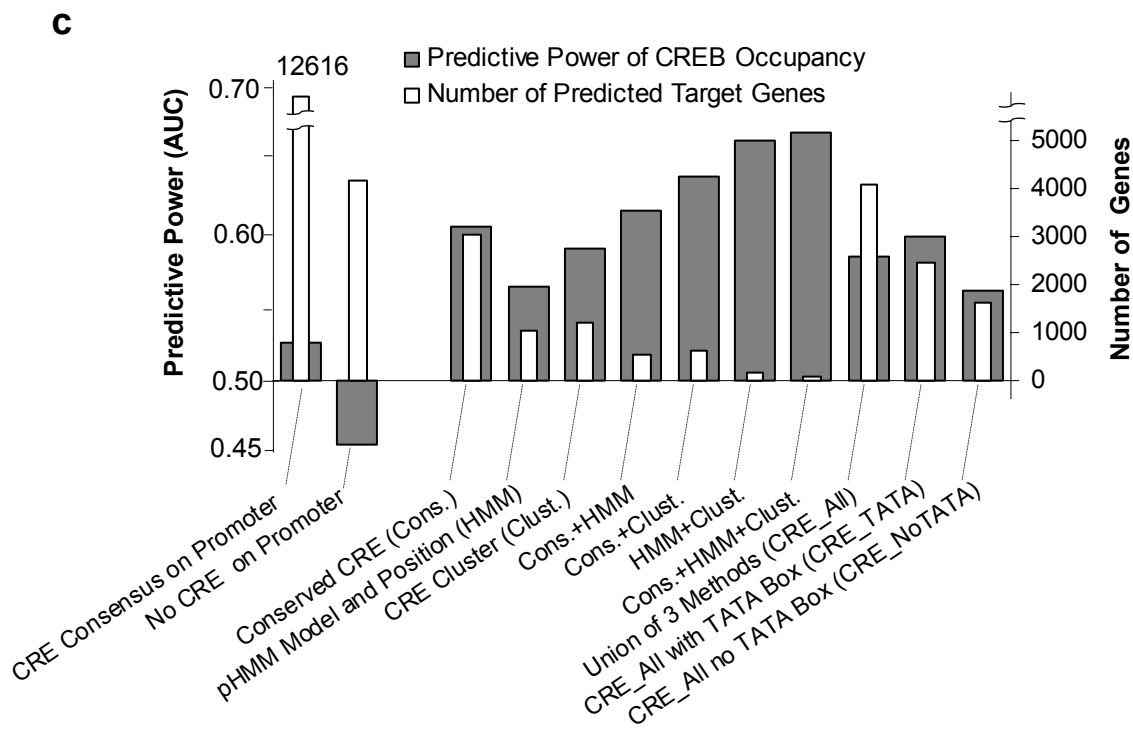

Supplement: pnas_102_12_4459__1.pdf [file pnas_102_12_4459__1.pdf]

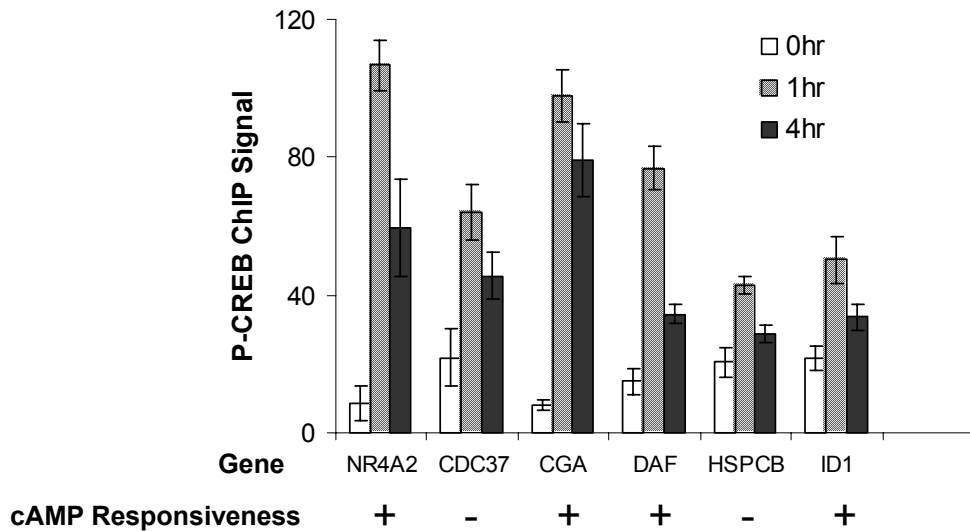

Supplement: pnas_102_12_4459__2.pdf [file pnas_102_12_4459__2.pdf]

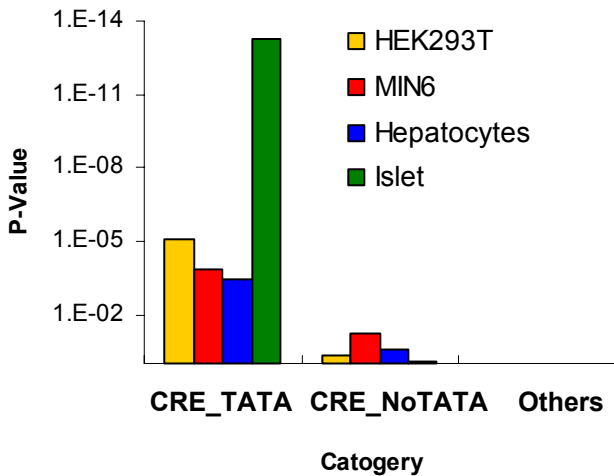

Supplement: pnas_102_12_4459__3.pdf [file pnas_102_12_4459__3.pdf]
